# Supplementary material for: NEAT1–SOD2 Axis Confers Sorafenib and Lenvatinib Resistance by Activating AKT in Liver Cancer Cell Lines
Source: MDPI journal article supplement (doi:10.3390/cimb45020071), 2023-01-29
Supplement: s1 [file s1]

**Table S1: Key Resources Table**

| Reagents / Resource             | Source                                                 | Identifier       |
|---------------------------------|--------------------------------------------------------|------------------|
| <b>Cell Lines</b>               |                                                        |                  |
| HLF                             | Japanese Collection of Research Bioresources Cell Bank | JCRB0405         |
| HuH6                            | Japanese Collection of Research Bioresources Cell Bank | JCRB0401         |
| HLF overexpressing NEAT1v1      | Our group                                              | N/A              |
| HuH6 overexpressing NEAT1v1     | Our group                                              | N/A              |
| 293A                            | Invitrogen                                             | R70507           |
| <b>Plasmid DNAs and vectors</b> |                                                        |                  |
| pcDNA6-hNEAT1v1-AcGFP           | Our group                                              | N/A              |
| pENTR/U6-AmCyan1                | Our group                                              | N/A              |
| pAd/BLOCK-iT-DEST               | Invitrogen                                             | V49220           |
| Adenovirus shNT                 | Our group                                              | N/A              |
| Adenovirus shNEAT1a/b           | Our group                                              | N/A              |
| Adenovirus shSOD2a/b            | Our group                                              | N/A              |
| <b>Chemicals and reagents</b>   |                                                        |                  |
| Ligation High version 2         | Toyobo                                                 | LGK-201          |
| Lipofec-tAMINE2000              | Invitrogen                                             | 11668019         |
| Blasticidin S, Hydrochloride    | Kaken Pharmaceutical                                   | KK-400           |
| Sorafenib                       | Adipogen Life Sciences                                 | AG-CR1-0025-M001 |
| Lenvatinib mesylate             | Toronto Research Chemicals                             | L215980          |
| Capivasertib                    | Adooq Bioscience                                       | A11759           |
| Cell Counting Kit-8             | Dojindo                                                | CK04             |
| Sodium tauroursodeoxycholate    | Nacalai                                                | 32731-24         |
| <b>Antibodies</b>               |                                                        |                  |
| AKT                             | Cell Signaling Technology                              | #9272            |
| P-AKT (S473)                    | Cell Signaling Technology                              | #9271            |
| P-AMPK $\alpha$ (T172)          | Cell Signaling Technology                              | #4188            |
| P-EIF2 $\alpha$ (S51)           | Cell Signaling Technology                              | #9721            |
| P-ERK1/2 (Y202/204)             | Cell Signaling Technology                              | #9101            |
| IRE1 $\alpha$                   | Cell Signaling Technology                              | #3294            |
| JNK                             | Cell Signaling Technology                              | #9252            |
| P-JNK (T183/Y185)               | Cell Signaling Technology                              | #9251            |
| P-MEK1/2 (Ser217/221)           | Cell Signaling Technology                              | #9154            |
| P-mTOR (S2448)                  | Cell Signaling Technology                              | #2971            |
| P38                             | Cell Signaling Technology                              | #9212            |
| P-P38 (T180/Y182)               | Cell Signaling Technology                              | #9211            |
| AMPK $\alpha$ 1/2               | Santa Cruz Biotechnology                               | sc-74461         |
| ATF4                            | Santa Cruz Biotechnology                               | sc-390063        |
| ATF6 $\alpha$                   | Santa Cruz Biotechnology                               | sc-166659        |
| EIF2 $\alpha$                   | Santa Cruz Biotechnology                               | sc-133132        |
| ERK1/2                          | Santa Cruz Biotechnology                               | sc-514302        |
| GAPDH                           | Santa Cruz Biotechnology                               | sc-365062        |
| MEK1/2                          | Santa Cruz Biotechnology                               | sc-81504         |
| PERK                            | Santa Cruz Biotechnology                               | sc-377400        |
| $\beta$ TUB                     | Santa Cruz Biotechnology                               | sc-55529         |
| XBP1                            | Santa Cruz Biotechnology                               | sc-8015          |
| P-IRE1(S724)                    | Abcam                                                  | ab124945         |
