# Supplementary material for: NEAT1–SOD2 Axis Confers Sorafenib and Lenvatinib Resistance by Activating AKT in Liver Cancer Cell Lines
Source: MDPI journal article supplement (doi:10.3390/cimb45020071), 2023-01-29
Supplement: s1 [file s1]

**Table S3: Ct values** <sup>\*1</sup>

| Figure 5A  |      |          | $\beta$ -actin | BIP     | CHOP  | ERO1 $\alpha$ |  |
|------------|------|----------|----------------|---------|-------|---------------|--|
| HLF        | CTRL | shNT     | 15.80          | 17.11   | 21.96 | 21.72         |  |
|            |      | shNEAT1a | 15.67          | 16.05   | 21.21 | 20.69         |  |
|            |      | shSOD2a  | 15.98          | 16.43   | 21.25 | 20.81         |  |
|            | TUDC | shNT     | 15.29          | 17.14   | 22.24 | 21.67         |  |
|            |      | shNEAT1a | 15.30          | 16.93   | 21.71 | 21.02         |  |
|            |      | shSOD2a  | 15.65          | 17.27   | 21.75 | 21.06         |  |
| HuH6       | CTRL | shNT     | 15.75          | 18.01   | 22.84 | 21.94         |  |
|            |      | shNEAT1a | 15.65          | 16.93   | 21.89 | 20.80         |  |
|            |      | shSOD2a  | 16.19          | 17.43   | 22.19 | 20.87         |  |
|            | TUDC | shNT     | 15.35          | 19.12   | 23.64 | 21.98         |  |
|            |      | shNEAT1a | 15.13          | 17.78   | 23.01 | 21.00         |  |
|            |      | shSOD2a  | 15.74          | 18.60   | 23.25 | 21.06         |  |
| Figure S3A |      |          | $\beta$ -actin | BIP     | CHOP  | ERO1 $\alpha$ |  |
|            | HLF  | CTRL     | 13.68          | 16.10   | 18.20 | 20.34         |  |
|            |      | NEAT1v1  | 13.70          | 16.90   | 19.17 | 20.19         |  |
|            | HuH6 | CTRL     | 13.43          | 16.75   | 19.76 | 20.39         |  |
|            |      | NEAT1v1  | 13.59          | 18.04   | 22.21 | 20.72         |  |
| Figure S3B |      |          | total NEAT1    | NEAT1v2 | SOD2  |               |  |
| HLF        | CTRL | shNT     | 21.18          | 22.74   | 23.02 |               |  |
|            |      | shNEAT1a | 21.72          | 23.30   | 23.27 |               |  |
|            |      | shSOD2a  | 21.38          | 23.06   | 24.58 |               |  |
|            | TUDC | shNT     | 21.05          | 22.68   | 22.44 |               |  |
|            |      | shNEAT1a | 21.81          | 23.10   | 22.76 |               |  |
|            |      | shSOD2a  | 21.06          | 22.96   | 24.15 |               |  |
|            | HuH6 | CTRL     | shNT           | 21.98   | 23.49 | 21.42         |  |
|            |      |          | shNEAT1a       | 22.50   | 23.93 | 21.61         |  |
|            |      |          | shSOD2a        | 22.35   | 24.06 | 22.84         |  |
| TUDC       |      | shNT     | 21.79          | 23.17   | 21.04 |               |  |
|            |      | shNEAT1a | 22.64          | 24.09   | 21.60 |               |  |
|            |      | shSOD2a  | 22.21          | 23.62   | 22.37 |               |  |

\*1. Values are means of 3 experiments.
