# Supplementary material for: NEAT1–SOD2 Axis Confers Sorafenib and Lenvatinib Resistance by Activating AKT in Liver Cancer Cell Lines
Source: MDPI journal article supplement (doi:10.3390/cimb45020071), 2023-01-29
Supplement: s1 [file s1]

**Table S2: Oligo DNAs used in this study****Oligo DNAs for adenovirus vector construction**

|                 |                                                           |
|-----------------|-----------------------------------------------------------|
| shNT            |                                                           |
| shNT-U          | CACCGGGCGCGATAGCGCTAATAATTTCTCGAGAAATTATTAGCGCTATCGCGCTTT |
| shNT-D          | GAAAAAAGCGCGATAGCGCTAATAATTTCTCGAGAAATTATTAGCGCTATCGCGCCC |
| <i>shNEAT1a</i> |                                                           |
| shNEAT1a-U      | CACCGGGGAGTCGGTATTGTTGGTAATCTCGAGATTACCAACAATACCGACTCCTTT |
| shNEAT1a-D      | GAAAAAAGGAGTCGGTATTGTTGGTAATCTCGAGATTACCAACAATACCGACTCCCC |
| <i>shNEAT1b</i> |                                                           |
| shNEAT1b-U      | CACCGGATGGACCGTGGTTTGTACTACTCGAGTAGTAACAAACCACGGTCCATTTT  |
| shNEAT1b-D      | GAAAAAAATGGACCGTGGTTTGTACTACTCGAGTAGTAACAAACCACGGTCCATCC  |
| <i>shSOD2a</i>  |                                                           |
| shSOD2a_U       | CACCGGGCACGCTTACTACCTTCAGTACTCGAGTACTGAAGGTAGTAAGCGTGCTTT |
| shSOD2a_D       | GAAAAAAGCACGCTTACTACCTTCAGTACTCGAGTACTGAAGGTAGTAAGCGTGCCC |
| <i>shSOD2b</i>  |                                                           |
| shSOD2b_U       | CACCGGGTGGTGGTCATATCAATCATACTCGAGTATGATTGATATGACCACCACTTT |
| shSOD2b_D       | GAAAAAAGTGGTGGTCATATCAATCATACTCGAGTATGATTGATATGACCACCACCC |

**qPCR primers***Adenovirus titration*

|                 |                      |
|-----------------|----------------------|
| AdE2B_Titer_For | TGTCAAGCTTGGTGGCAAAC |
| AdE2B_Titer_Rev | TCGCGACAAAAACCAAACCC |

*mRNA determination*

|                   |                         |
|-------------------|-------------------------|
| ACTB_S            | GATGCAGAAGGAGATCACTGC   |
| ACTB_AS           | TGATCCACATCTGCTGGAAG    |
| total NEAT1_S     | TGCCACAACGCAGATTGATG    |
| total NEAT1_AS    | ACAAGAAGGCAGGCAAACAG    |
| NEAT1v2_S         | AGGGTTCTGTTGCTAACACG    |
| NEAT1v2_AS        | TGCCGATGAAGCAACAAAGC    |
| SOD2_S            | ACATCAACGCGCAGATCATG    |
| SOD2_AS           | TGCAGGCTGAAGAGCTATCTG   |
| BIP_S             | AACCGCTGAGGCTTATTTGG    |
| BIP_AS            | TCTTTGGTTGCTTGCGGTTG    |
| CHOP_S            | GCGCATGAAGGAGAAAGAACAG  |
| CHOP_AS           | ATTTCCTGCTTGAGCCGTTT    |
| ERO1 $\alpha$ _S  | AAGGGACTGTGCTGTCAAAC    |
| ERO1 $\alpha$ _AS | CTCCAAGTCGTTTCAGCTTGTTT |
